# Supplementary material
Source: Frontiers journal article supplement (https://www.frontiersin.org/articles/496913)
Supplement: Image_1.pdf [file Image_1.pdf]

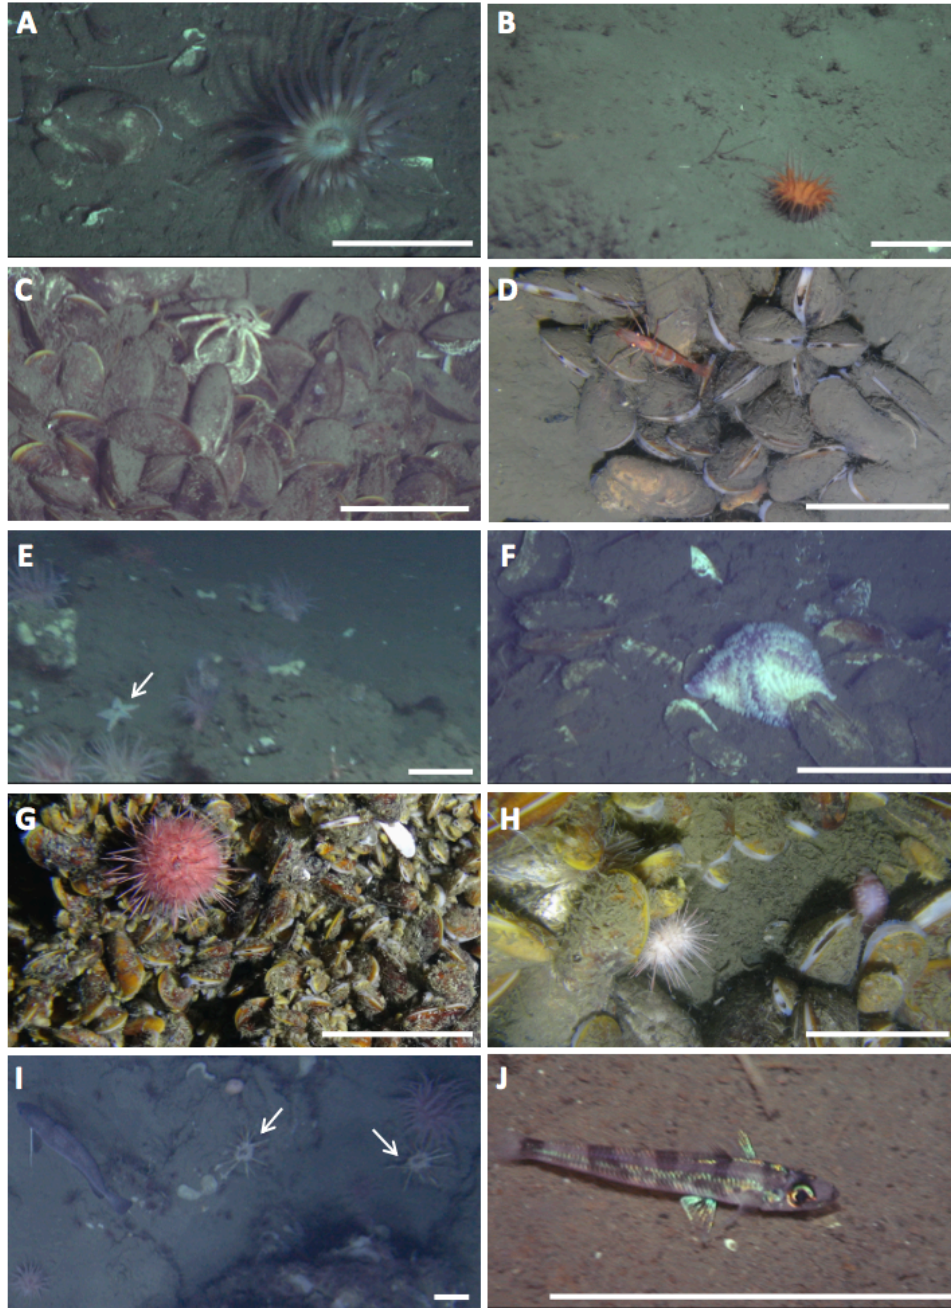

**Supplementary Figure 1. Taxa that could not be identified to family level.**

(A) Actinaria sp. 2 at Baltimore (Dive 4808). (B) Actinaria sp. 3 at Norfolk East (Dive 4802). (C) Paguroidea sp. at Baltimore (Dive 4807). (D) Caridea sp. at Chincoteague East (Dive 4806). (E) Asteroidea sp. 1 (arrow) at Pick-Up Sticks (Dive 4805). (F) Asteroidea sp. 2 at Baltimore (Dive 4808). (G) Echinoidea sp. 1 at Veatch (Dive 4813). (H) Echinoidea sp. 2 at Norfolk West (Dive 4803). (I) Echinoidea sp. 3 (arrows) at Pick-Up Sticks (Dive 4805). (J) Unidentified fish sp. 1 at Baltimore (Dive 4808). Scale bars: ~10cm.
