# Supplementary material
Source: Frontiers journal article supplement (https://www.frontiersin.org/articles/496913)
Supplement: Table_2.pdf [file Table_2.pdf]

**Supplementary Table 2. Transect summary statistics.** For each transect the total distance, number of frames and sample area is provided. The number of frames and sample area are separated into dense live, dead and mixed (i.e., live and dead) mussel coverage, where dense is defined as covering  $\geq 75\%$  of the image. Remaining frames are classed as ‘sparse coverage’. Pick-Up Sticks and Shallop West transects only consist of ‘sparse coverage’ because an extensive mussel bed was not observed, only areas of active methane seepage. NA = not applicable (no mussels present).

| Site Name                      | Alvin Dive Number | Distance (m) | Total Number of Frames | Total Area (m <sup>2</sup> ) | Dense Live Mussels |                        | Dense Dead Mussels |                        | Dense Mixed Mussels |                        | Sparse Coverage |                        |
|--------------------------------|-------------------|--------------|------------------------|------------------------------|--------------------|------------------------|--------------------|------------------------|---------------------|------------------------|-----------------|------------------------|
|                                |                   |              |                        |                              | No. of Frames      | Area (m <sup>2</sup> ) | No. of Frames      | Area (m <sup>2</sup> ) | No. of Frames       | Area (m <sup>2</sup> ) | No. of Frames   | Area (m <sup>2</sup> ) |
| Pick-Up Sticks                 | 4805              | 95           | 50                     | 360                          | NA                 | NA                     | NA                 | NA                     | NA                  | NA                     | 50              | 360                    |
| Baltimore                      | 4808 (Transect 1) | 80           | 60                     | 655                          | 5                  | 51.7                   | 39                 | 423.3                  | 16                  | 179.4                  | 0               | 0                      |
|                                | 4808 (Transect 2) | 65           | 46                     | 265                          | 12                 | 79.1                   | 6                  | 23.1                   | 28                  | 161.1                  | 0               | 0                      |
|                                | Total             | 145          | 106                    | 920                          | 17                 | 130.8                  | 45                 | 446.4                  | 44                  | 340.5                  | 0               | 0                      |
| Shallop West Chincoteague East | 4814              | 10           | 42                     | 100                          | NA                 | NA                     | NA                 | NA                     | NA                  | NA                     | 42              | 100                    |
|                                | 4804              | 95           | 64                     | 265                          | 45                 | 197.9                  | 10                 | 38.0                   | 8                   | 27.7                   | 1               | 2.2                    |
|                                | 4806              | 90           | 70                     | 150                          | 36                 | 75.4                   | 14                 | 34.2                   | 20                  | 39.9                   | 0               | 0                      |
| Total                          | 185               | 134          | 415                    | 81                           | 273.3              | 24                     | 72.2               | 28                     | 67.6                | 1                      | 2.2             |                        |
| Norfolk West Veatch            | 4803              | 100          | 89                     | 310                          | 12                 | 45.3                   | 29                 | 96.0                   | 35                  | 116.5                  | 13              | 50.3                   |
|                                | 4813 (Transect 1) | 50           | 41                     | 195                          | 12                 | 58.5                   | 10                 | 47.8                   | 7                   | 34.4                   | 12              | 52.4                   |
|                                | 4813 (Transect 2) | 75           | 62                     | 315                          | 22                 | 108.6                  | 8                  | 40.2                   | 8                   | 44.6                   | 24              | 123.8                  |
|                                | Total             | 125          | 103                    | 510                          | 34                 | 167.1                  | 18                 | 88.0                   | 15                  | 79.0                   | 36              | 176.2                  |
